# Supplementary material for: Inter-rater agreement and variability in visual reading and of [18F]Flutemetamol PET
Source: Research Square preprint supplement (doi:10.21203/rs.3.rs-4490178/v1), 2024-06-13
Supplement: Supplementary file 1 [file 300cb3740d56e35971c13675.docx]

**Table 2.** Interrater reliability with the Fleiss’ kappa, Conger’s kappa, and Krippendorff’s α tests

| Fleiss’ kappa | Fleiss’ kappa  95% CI | Conger’s kappa | Conger’s kappa  95% CI | Krippendorff’s α | Krippendorff’s α  95% CI |
| --- | --- | --- | --- | --- | --- |
| 0.83 | (0.76; 0.89) | 0.83 | (0.76; 0.89) | 0.83 | (0.76; 0.89) |

Kappa (95% CI) was calculated as kappa ± Z (1 – α/2) * SE (kappa).

Krippendorff’s α (95% CI) is calculated as Krippendorff’s α ± Z (1 – α/2) * SE (Krippendorff’s α).

CI: confidence interval, se:standard error.
