# Supplementary material for: Inter-rater agreement and variability in visual reading and of [18F]Flutemetamol PET
Source: Research Square preprint supplement (doi:10.21203/rs.3.rs-4490178/v1), 2024-06-13
Supplement: Supplementary file 2 [file bcb564185708265cd739c34a.docx]

**Table 1.** Visual ratings of 3 experts.

| Rating (positive) | Rating (negative) | n | Decision | n (%) |
| --- | --- | --- | --- | --- |
| 0 | 3 | 75 | negative | 91 (47.4%) |
| 1 | 2 | 16 |
| 2 | 1 | 9 | positive | 101 (52.6%) |
| 3 | 0 | 92 |

The positive or negative amyloid PET decision was based on the results of the expert raters. When there were differences in the expert visual ratings, the majority vote was adopted as the decision.
