# Supplementary material for: Inter-rater agreement and variability in visual reading and of [18F]Flutemetamol PET
Source: Research Square preprint supplement (doi:10.21203/rs.3.rs-4490178/v1), 2024-06-13
Supplement: Supplementary file 3 [file bd35e0939cd0502a0467fa3c.docx]

**Table 4.** Distribution of cases categorized by the Centiloid value

|  | Sum of confidence | | | | | Total, n |
| --- | --- | --- | --- | --- | --- | --- |
| Categorized by Centiloid value | +3 | +2 | +1 | 0 | -1 |  |
| Centiloid value < 12 | 26 (0) | 38 (3) | 14 (50) | 4 (50) | 0 | 82 (12) |
| 12 ≤ Centiloid value < 20 | 1 (0) | 0 | 4 (50) | 1 (0) | 1 (100) | 7 (43) |
| 20 ≤ Centiloid value < 40 | 1 (0) | 4 (0) | 4 (75) | 5 (60) | 1 (100) | 15 (47) |
| 40 ≤ Centiloid value | 43 (0) | 43 (7) | 0 | 2 (100) | 0 | 88 (6) |
| Total, n | 71 (0) | 85 (5) | 22 (55) | 12 (58) | 2 (100) | 192 (13) |

Parentheses show the percentage of disagreements.

The raters assigned confidence scores (-1 for neither, 0 for probable, +1 for certain) to each case. In this study, there were no cases in which the sum of confidence scores was -2 or -3.
