# Supplementary material for: Inter-rater agreement and variability in visual reading and of [18F]Flutemetamol PET
Source: Research Square preprint supplement (doi:10.21203/rs.3.rs-4490178/v1), 2024-06-13
Supplement: Supplementary file 4 [file de5586df62297f7f8a7ae782.docx]

**Table 3.** Relationship between Centiloid values and expert visual ratings

|  | All negative | One positive | Two positive | All positive | p value |
| --- | --- | --- | --- | --- | --- |
| n | 75 | 16 | 9 | 92 |  |
| Centiloid value (mean ± SD) | -2.0 ± 9.4 | 13.6 ± 16.1 | 28.5 ± 13.6 | 70.0 ± 24.6 | <0.0001† |

The data are the means (standard deviation).

In the case of one positive or two positive ratings, the majority vote was defined as agreement between two of three raters.

† One-way analysis of variance followed by Bonferroni post hoc correction.
